# Supplementary material for: Understanding alcohol aggregates and the water hydrogen bond network towards miscibility in alcohol solutions: graph theoretical analysis
Source: Royal Society of Chemistry journal article supplement (doi:10.1039/d0cp01991g), 2020-01-01
Supplement: d0cp01991g1.pdf [file d0cp01991g1.pdf]

# **Understanding Alcohol Aggregates and Water Hydrogen Bond Network Towards Miscibility in Alcohol Solutions: Graph Theoretical Analysis**

**Seungeui Choi,<sup>∇</sup> Saravanan Parameswaran<sup>∇</sup> and Jun-Ho Choi\***

Department of Chemistry, Gwangju Institute of Science and Technology (GIST), 123  
Cheomdangwagi-ro, Buk-gu, Gwangju 61005, Republic of Korea

## **SUPPORTING INFORMATION**

\*Author for correspondence: e-mail: junhochoi@gist.ac.kr

### **Author Contributions**

<sup>∇</sup>S.C. and S.P. contributed equally to this work.

**Table S1:** Population fraction of eigenvalue spectra for alcohol (above) and water (below) network. Non-integer value is associated with the presence of large alcohol (water) aggregates.

| Mole fraction   | Pure Water  | 0.09     | 0.29    | 0.41    | 0.5     | Pure Alcohol |
|-----------------|-------------|----------|---------|---------|---------|--------------|
| Alcohol Network |             |          |         |         |         |              |
| Methanol        | 0           | 0.87964  | 0.6715  | 0.5622  | 0.49033 | 0.15222      |
|                 | $\pm 1$     | 0.10824  | 0.23228 | 0.26264 | 0.268   | 0.11351      |
|                 | Non-integer | 0.01212  | 0.09622 | 0.17516 | 0.24167 | 0.73427      |
| Ethanol         | 0           | 0.85833  | 0.60301 | 0.52929 | 0.46269 | 0.16891      |
|                 | $\pm 1$     | -        | 0.1235  | 0.23258 | 0.25235 | 0.25243      |
|                 | Non-integer | 0.01817  | 0.16441 | 0.21836 | 0.28488 | 0.71356      |
| Butanol         | 0           | 0.70957  | 0.49111 | 0.427   | 0.39323 | 0.21441      |
|                 | $\pm 1$     | 0.18506  | 0.21374 | 0.21458 | 0.21307 | 0.13431      |
|                 | Non-integer | 0.10537  | 0.29515 | 0.35842 | 0.3937  | 0.65128      |
| Water Network   |             |          |         |         |         |              |
| Methanol        | 0           | 0.01067  | 0.01915 | 0.06203 | 0.11262 | 0.16183      |
|                 | $\pm 1$     | 0.002177 | 0.0383  | 0.12406 | 0.22524 | 0.32366      |
|                 | Non-integer | 0.987153 | 0.94255 | 0.81391 | 0.66214 | 0.51451      |
| Ethanol         | 0           | 0.01067  | 0.02007 | 0.06004 | 0.10564 | 0.14909      |
|                 | $\pm 1$     | 0.002177 | 0.00505 | 0.02221 | 0.0443  | 0.06906      |
|                 | Non-integer | 0.987153 | 0.97488 | 0.91775 | 0.85006 | 0.78185      |
| Butanol         | 0           | 0.01067  | 0.01873 | 0.04074 | 0.07671 | 0.1047       |
|                 | $\pm 1$     | 0.002177 | 0.00544 | 0.01539 | 0.03121 | 0.04551      |
|                 | Non-integer | 0.987153 | 0.97583 | 0.94387 | 0.89208 | 0.84979      |

**Table S2:** Comparison of density, the ensemble average degree and *lev* of alcohol and water aggregate for the box size effect from TIP3P water model.

|                              | Methanol                                             | Ethanol               | Butanol               |             |
|------------------------------|------------------------------------------------------|-----------------------|-----------------------|-------------|
| Number of molecules          | 700 Alcohol + 1000 Water (1400 Alcohol + 2000 Water) |                       |                       |             |
| Box size (Å <sup>3</sup> )   | 42.31 × 42.31 × 42.36                                | 45.90 × 45.88 × 45.93 | 51.79 × 51.67 × 51.83 |             |
|                              | (53.36 × 53.45 × 53.3                                | (57.86 × 57.86 × 57.8 | (65.15 × 65.42 × 65.3 |             |
|                              | 6)                                                   | 0)                    | 5)                    |             |
| Density (g/cm <sup>3</sup> ) | 0.89 (0.88)                                          | 0.86 (0.86)           | 0.84 (0.83)           |             |
| Degree                       | Alcohol Aggregate                                    | 0.60 (0.63)           | 0.67 (0.74)           | 0.92 (1.01) |
|                              | Water Aggregate                                      | 2.18 (2.22)           | 2.29 (2.37)           | 2.73 (2.91) |
| <i>lev</i>                   | Alcohol Aggregate                                    | 2.14 (2.09)           | 2.15 (2.29)           | 2.31 (2.42) |
|                              | Water Aggregate                                      | 3.39 (3.47)           | 3.54 (3.66)           | 3.82 (3.94) |

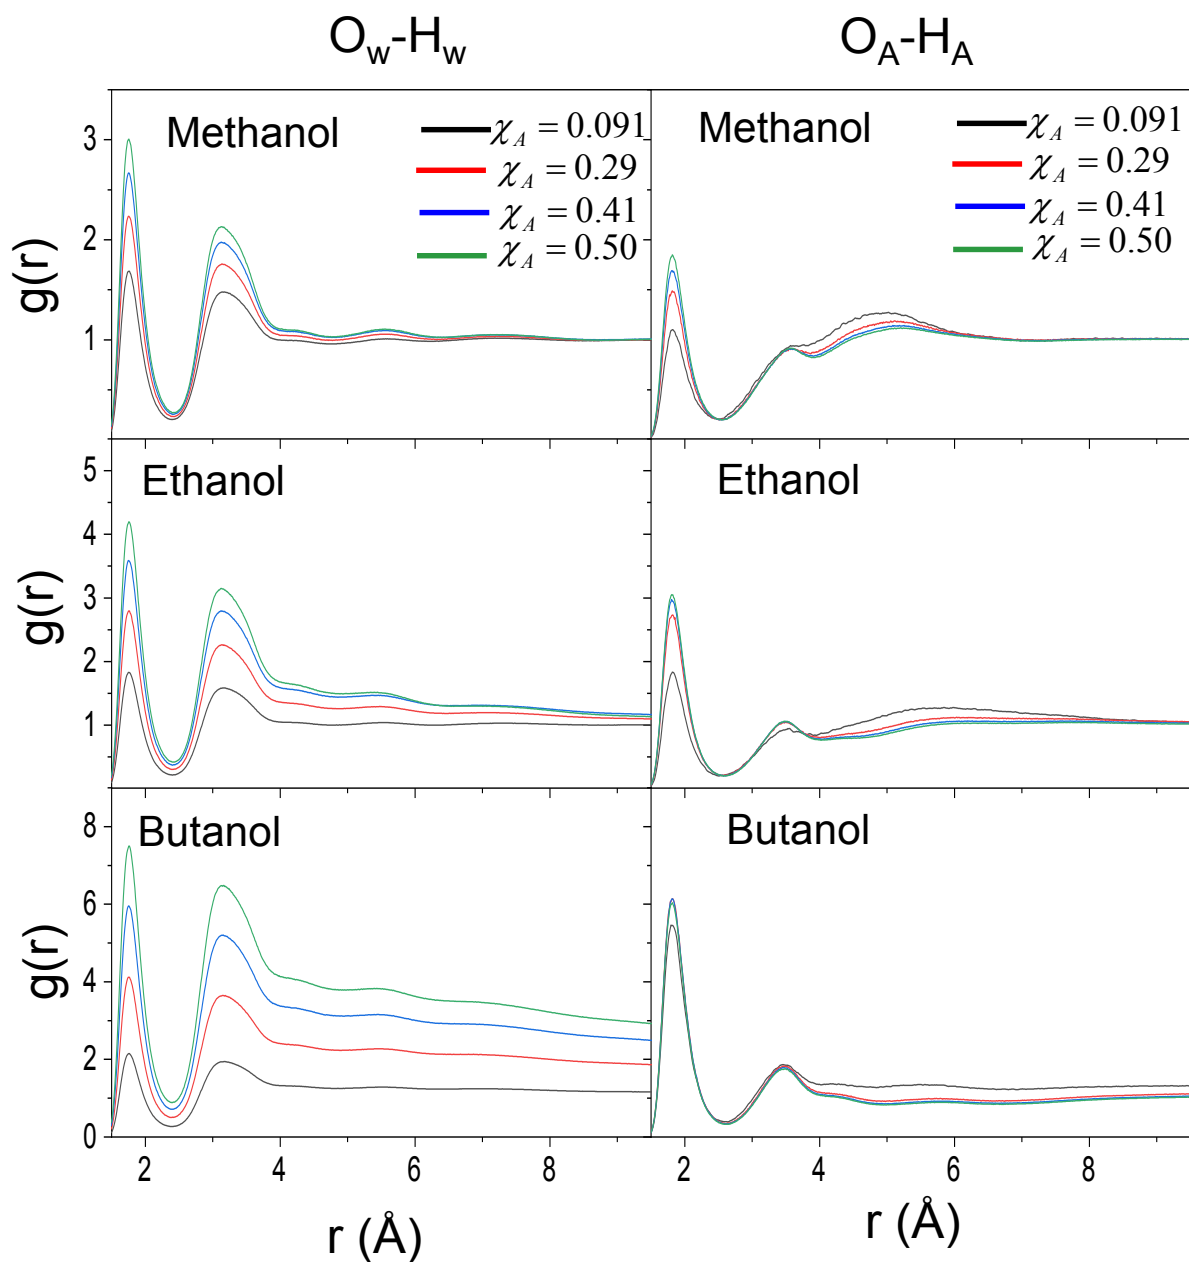

**Figure S1.** Radial distribution functions of water-water (between O-atom [O<sub>w</sub>] and H-atom [H<sub>w</sub>]) and alcohol-alcohol (between O-atom [O<sub>A</sub>] and H-atom [H<sub>A</sub>] of hydroxyl group) for methanol, ethanol, and butanol solutions with SPC/E water model. These functions are used for the construction of edges for graph theoretical analysis.

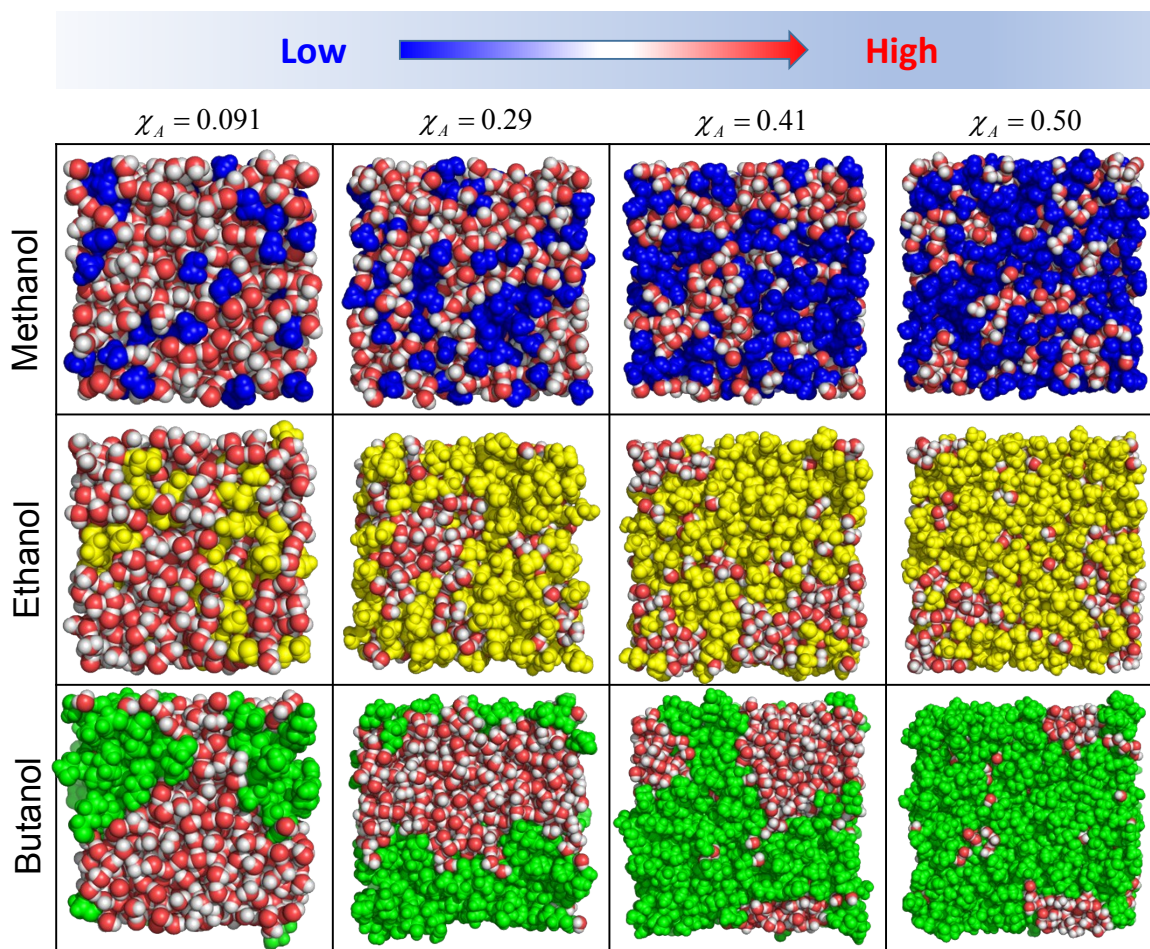

**Figure S2.** Snapshot structures of the three alcohol solutions with SPC/E water model provided structural insights in the formation of alcohol aggregates and the disruption of water H-bond network as the alcohol concentration increases. The methanol, ethanol, and butanol molecules in water-alcohol mixtures are represented by blue, yellow, and green color spheres, respectively. The oxygen and hydrogen atoms in water molecule are represented by red and white spheres, respectively.

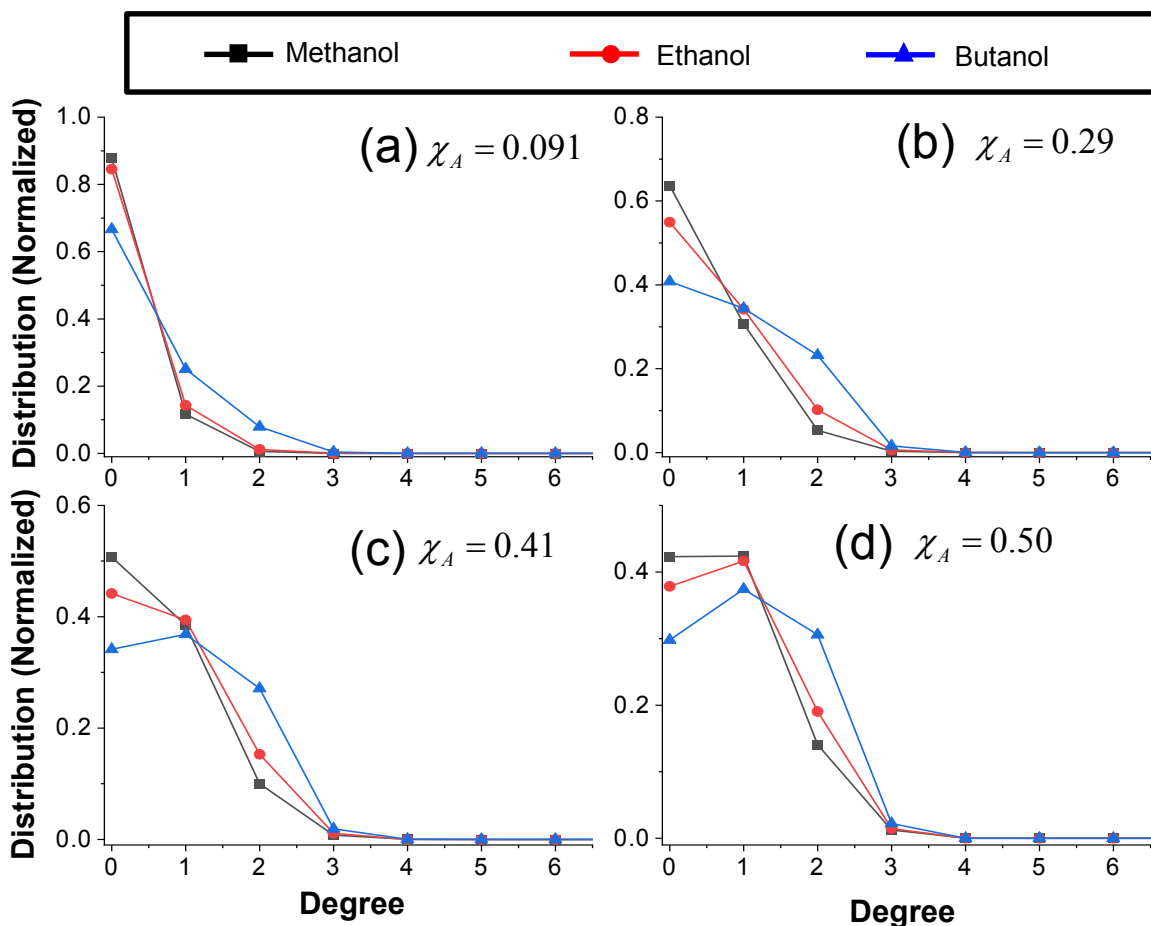

**Figure S3.** Normalized average degree distributions of alcohol aggregates for the three alcohol solutions with SPC/E water model confirm the formation of large alcohol aggregates, while the partially-miscible butanol aggregates have relatively slow decay pattern and segmented from water, as observed in TIP3P water model.

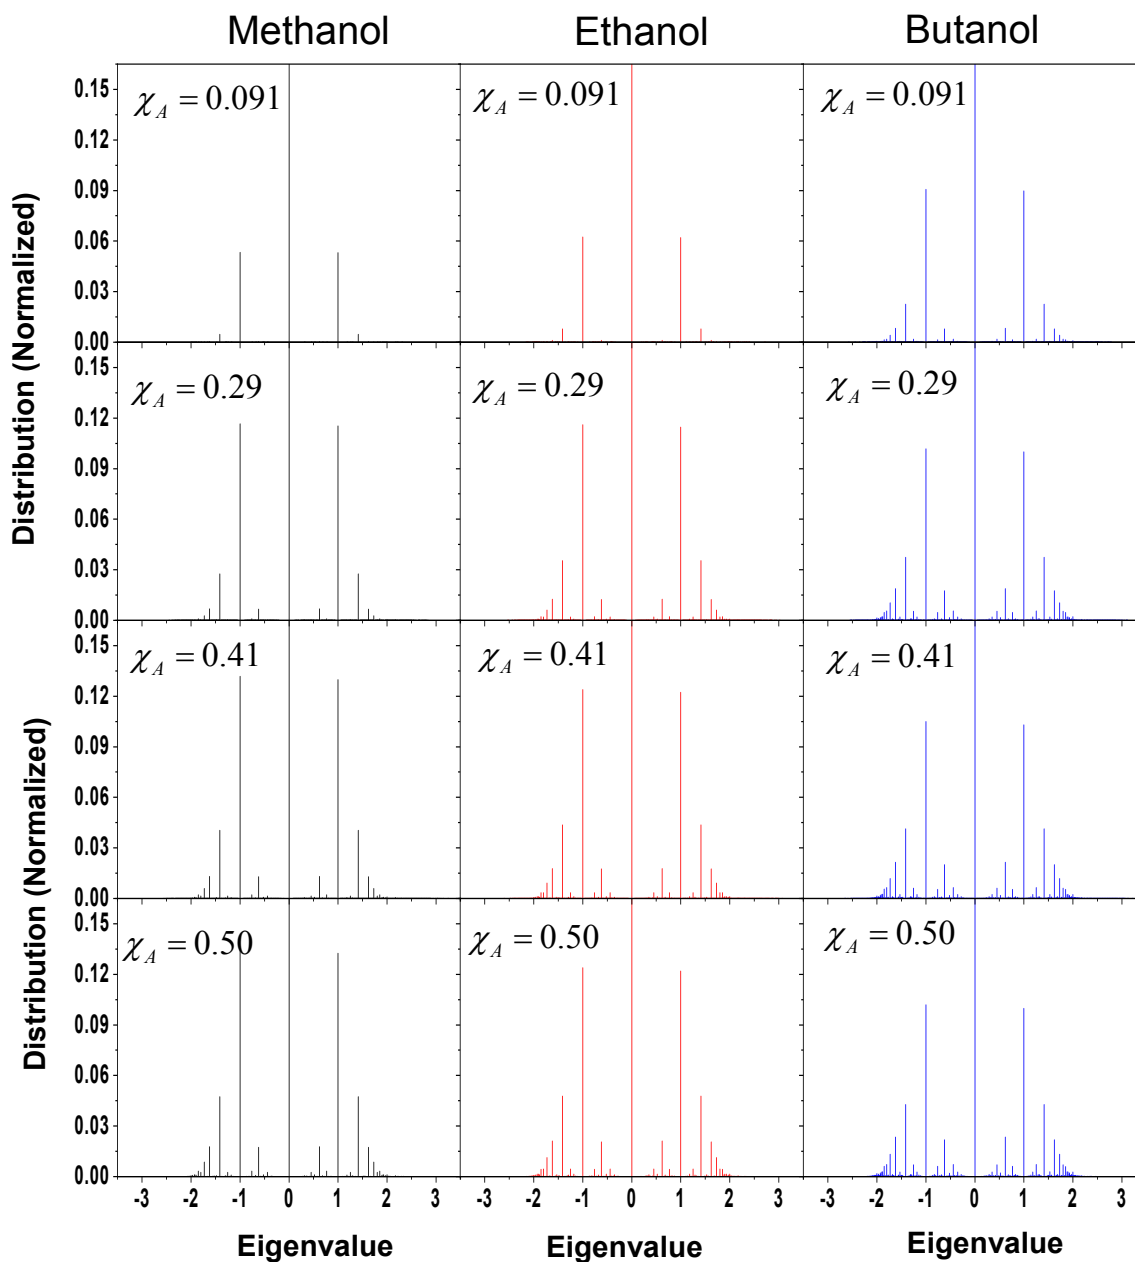

**Figure S4.** Normalized eigenvalue spectra are plotted for methanol, ethanol, and butanol solutions of mole fractions 0.091, 0.29, 0.41, and 0.50 with SPC/E water model. The eigenvalue spectra of alcohol aggregates indicated the growth of alcohol H-bond aggregates, while the spectral density of butanol is much denser, revealing the presence of comparatively larger aggregates.

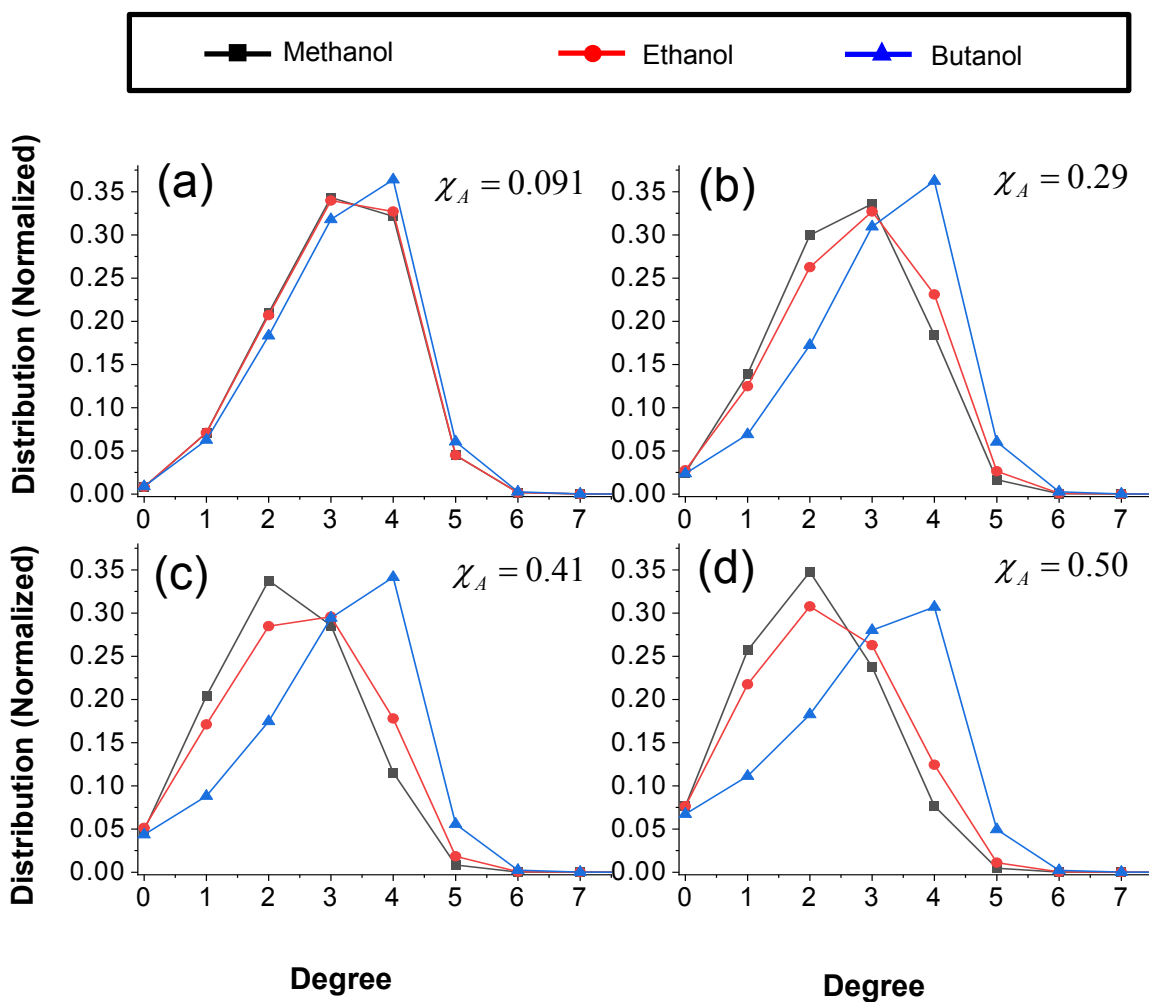

**Figure S5.** Normalized average degree distributions of water H-bond networks for the three alcohol solutions with SPC/E water model. The pattern observed in butanol solution is similar in both the water models, showing that the H-bond networks of butanol are not entangled with water H-bond network.



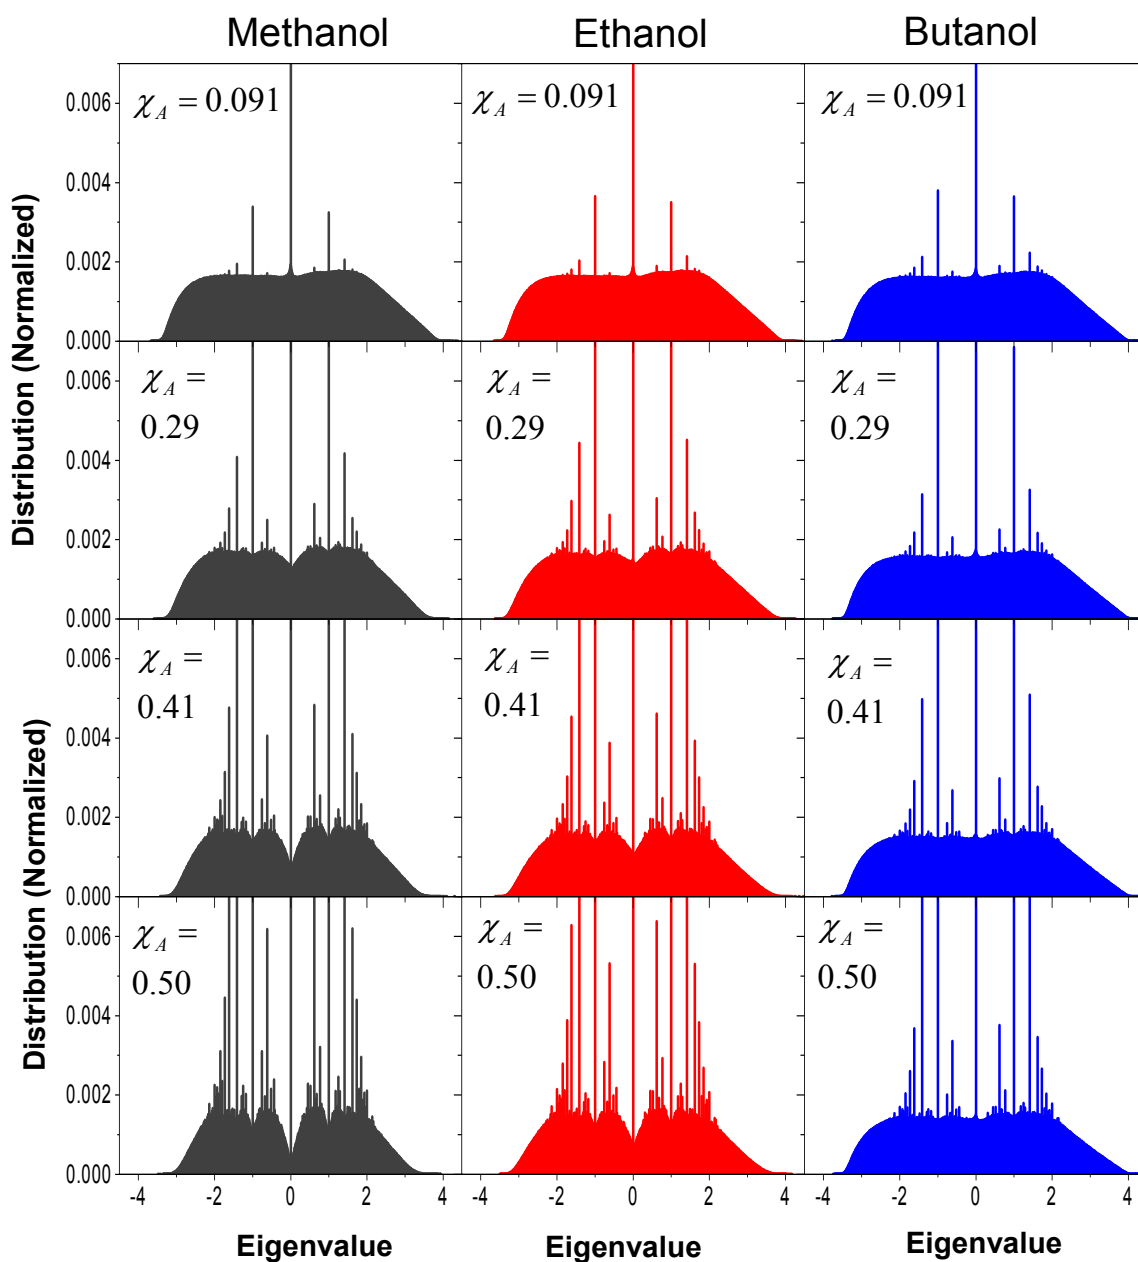

**Figure S6.** Normalized eigenvalue spectra of water H-bond networks in methanol, ethanol, and butanol solutions with SPC/E water model showed a serious disruption of water H-bond network in the miscible alcohol solutions, whereas the eigenvalue spectrum of butanol solution demonstrating that the butanol aggregates does not disrupt the water H-bond structure significantly. For the four mole fractions of 0.091, 0.29, 0.41, and 0.50, the eigenvalue spectra are plotted for each alcohol solution.
